# Supplementary figures and images for: Efficacy and safety of dose escalation of tofacitinib in refractory anti-MDA5 antibody-positive dermatomyositis
Source: PubMed Central journal article supplement — RMD Open. 2023 Jan 2;9(1):e002795. doi: 10.1136/rmdopen-2022-002795 (PMC9809321; doi:10.1136/rmdopen-2022-002795), 2023-01-02

## Supplementary Figure 1

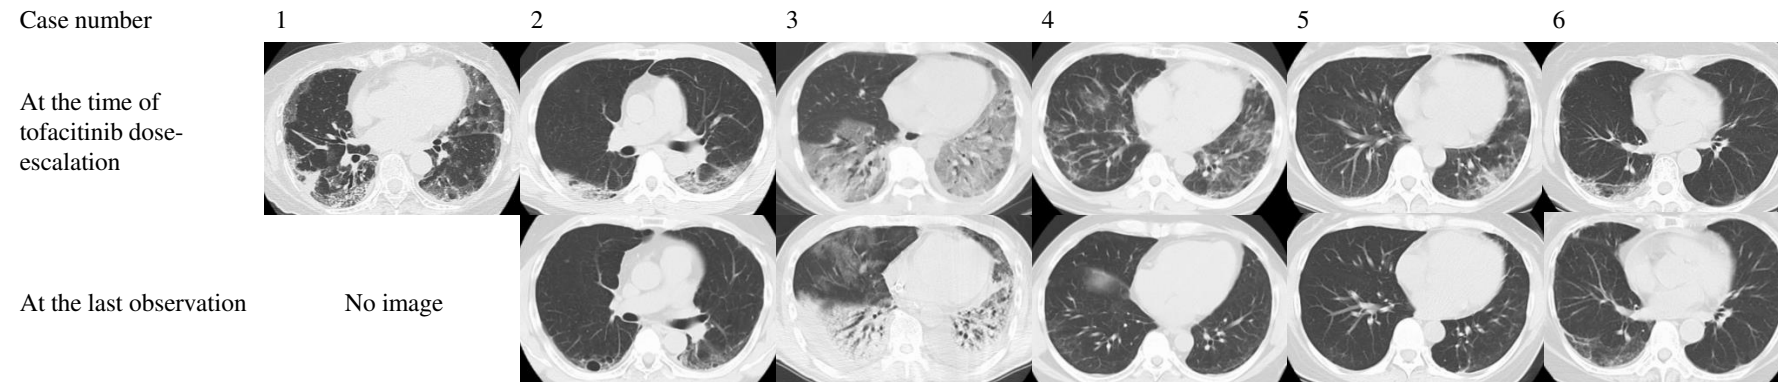

Supplement: rmdopen-2022-002795supp001.pdf [file rmdopen-2022-002795supp001.pdf]
